# Supplementary material for: Fe3O4-decorated MXene for the effective removal of 133Ba and 137Cs: synthesis, characterization, and optimization via response surface methodology (RSM)
Source: Royal Society of Chemistry journal article supplement (doi:10.1039/d4qi00404c), 2024-01-01
Supplement: d4qi00404c1.pdf [file d4qi00404c1.pdf]

## Electronic supplementary information

### **Fe<sub>3</sub>O<sub>4</sub>-Decorated MXene for Effective Removal of <sup>133</sup>Ba and <sup>137</sup>Cs: Synthesis, Characterization, and Optimization via Response Surface Methodology (RSM)**

Shalu Atri<sup>a\*‡</sup>, Vipul Vilas Kusumkar<sup>b‡</sup>, Süleyman İnan<sup>c</sup>, Maros Gregor<sup>d</sup>, Tomas Roch<sup>d</sup>,  
Maria Caplovicova<sup>e</sup>, Michal Galambos<sup>b</sup>, Eva Viglasova<sup>b</sup>, Gustav Plesch<sup>a</sup>, Martin Motola<sup>a</sup>,  
Olivier Monfort<sup>a\*</sup>

<sup>a</sup>Department of Inorganic Chemistry, Faculty of Natural Sciences, Comenius University  
Bratislava, Ilkovicova 6, Mlynska dolina, 84215 Bratislava, Slovakia

<sup>b</sup>Department of Nuclear Chemistry, Faculty of Natural Sciences, Comenius University  
Bratislava, Ilkovicova 6, Mlynska dolina, 842 15 Bratislava, Slovakia

<sup>c</sup>Ege University Institute of Nuclear Sciences, 35100 Bornova-İzmir, Türkiye

<sup>d</sup>Department of Experimental Physics, Faculty of Mathematics Physics and Informatics,  
Comenius University Bratislava, Mlynska dolina F2, 84248 Bratislava, Slovakia

<sup>e</sup>STU Center for Nanodiagnostics, Faculty of Materials Science and Technology in Trnava,  
Slovak Technical University in Bratislava, Vazovova 5, 81243 Bratislava, Slovakia

## **S1. Experimental**

All the chemicals used in the synthesis of MXene,  $\text{Fe}_3\text{O}_4$ , MXene- $\text{Fe}_3\text{O}_4$  composite and adsorption studies are of analytical grade and used as such without further purification. Barium chloride ( $\text{BaCl}_2$ , 99.90%, M: 208.23 g/mol), cesium chloride ( $\text{CsCl}$ , 99.90%, M: 168.36 g/mol), were purchased from Merck. Radiotracer concentration was as follows:  $^{133}\text{Ba}$  in the form of [ $^{133}\text{Ba}$ ]  $\text{BaCl}_2$  (Eurostandard CZ s.r.o., Czech Republic) with a volume activity of 2 MBq/mL and  $^{137}\text{Cs}$  in the form of [ $^{137}\text{Cs}$ ]  $\text{CsCl}$  (National Centre for Nuclear Research, Poland) with a volume activity of 55 MBq/mL.

### **S1.1 Synthesis of $\text{Fe}_3\text{O}_4$**

1.3254 g of ferrous chloride tetrahydrate ( $\text{FeCl}_2 \cdot 4\text{H}_2\text{O}$ , AcrosOrganics, 99+ %) was stirred on magnetic stirrer in 20 mL distilled water till complete dissolution. Then 5.6 g of sodium hydroxide ( $\text{NaOH}$ , Merck, >97.0 %) in 40 mL distilled water was slowly added to this solution with vigorous stirring. The reaction mixture colour change took place within 1-2 minutes, from yellow to black with exothermic reaction, and then left to stir for 15 minutes at room temperature before its transfer to a 90 mL capacity hydrothermal autoclave reactor vessel for hydrothermal reaction at 180 °C for 12 h. After cooling down, the obtained product was washed several times with distilled water until neutral pH and dried at 60 °C.

### **S1.2 Synthesis of MXene**

The preparation of MXene was carried out by acid-salt etching route wherein 2.94 g of ammonium fluoride ( $\text{NH}_4\text{F}$ , Merck, >98.0 %) in 20 mL hydrochloric acid ( $\text{HCl}$ , Merck, 37.0-38.0 %) was sonicated for 15 minutes, then 0.5 g of titanium aluminum carbide ( $\text{Ti}_3\text{AlC}_2$ , Merck, >90.0 %) commercial powder (40  $\mu\text{m}$  mesh size) was added slowly within 30 minutes, to avoid explosive reaction with evolution of  $\text{H}_2$  gas. The reaction mixture kept on a magnetic

stirrer for 48 h at 25 °C, and the solution was decanted followed by ultrasonication of the reaction product in 2M HCl for 15 minutes to remove extra impurities. The obtained product was washed with distilled water until pH 6 attained and then dried using vacuum assisted filtration system.

### **S1.3 Synthesis of $Ti_3C_2T_x-Fe_3O_4$ (MXF-30)**

To prepare this, 2.0 g of sodium acetate ( $CH_3COONa$ , Thermo Fisher scientific, 99.0 %), 0.75 g of polyethylene glycol (PEG, Fisher scientific) and stoichiometric ratio of MXene and  $Fe_3O_4$  were added to 60 mL ethylene glycol ( $C_2H_6O_2$ , Fisher Scientific) as solvent in autoclave reactor. Afterwards, entire reaction mixture was ultrasonicated for 30 minutes and then subjected to solvothermal conditions at 180 °C for 12 h. The obtained black color powder was washed several times with distilled water, followed by washing with absolute ethanol at the end and dried at 40 °C.

## **S2 Design of Experiments**

The optimal conditions for the adsorption of  $Ba^{2+}$  and  $Cs^+$  ions were determined using BBD based on RSM. The influence of process variables, namely initial pH ( $A$ ), contact time ( $B$ ), and radionuclide concentration ( $C$ ), on adsorption was investigated through individual experimental studies conducted separately for both  $Ba^{2+}$  and  $Cs^+$ . The response chosen for the optimization process was adsorption capacity ( $q$ ). Table S1 summarizes the levels and ranges of process variables employed in the design. Eq. (1) presents the model equation, incorporating both linear and quadratic terms to estimate the optimal response.

$$y = b_0 + b_1A + b_2B + b_3C + b_{11}A^2 + b_{22}B^2 + b_{33}C^2 + b_{12}AB + b_{13}AC + b_{23}BC \quad (1)$$

In Eq. (1),  $y$  denotes the response, which is the adsorption capacity of  $Ba^{2+}$  and  $Cs^+$ .  $A$ ,  $B$ , and  $C$  represent the coded variables. The coefficients corresponding to the intercept term, linear,

quadratic, and dual interaction effects are represented as  $b_0$ ,  $b_1$ ,  $b_2$ ,  $b_3$ ,  $b_{11}$ ,  $b_{22}$ ,  $b_{33}$ , and  $b_{12}$ ,  $b_{13}$ ,  $b_{23}$ , respectively.

**Table S1** Levels and ranges of independent variables used in BBD

| Variable             | Unit  | Code | Level    |            |           |
|----------------------|-------|------|----------|------------|-----------|
|                      |       |      | -1 (low) | 0 (center) | +1 (high) |
| <b>Initial pH</b>    | -     | A    | 3        | 5.5        | 8         |
| <b>Contact time</b>  | min   | B    | 30       | 135        | 240       |
| <b>Concentration</b> | mol/L | C    | 0.0001   | 0.05005    | 0.1       |

With the utilization of Design-Expert 13, a total of 17 experiments were designed and randomly conducted separately for  $Ba^{2+}$  and  $Cs^{+}$ . Afterwards, the acquired data underwent statistical, regression, and graphical analysis. Analysis of variance (ANOVA) was used as a diagnostic tool to assess the effectiveness of the proposed model.

### S3 Adsorption studies

Adsorption of  $^{133}Ba$  and  $^{137}Cs$  radioisotopes on MXF-30 was investigated using a radioisotope indication method. The experimental runs were conducted using a batch method under aerobic conditions at room temperature. The influence of initial pH, initial concentration and contact time parameters on the adsorption was analysed as follows: 5 mL of the aqueous phase (containing radiotracer  $^{133}Ba$  and  $^{137}Cs$ ), was added to 25 mg of MXF-30 (5.0 g/L). Subsequently, the mixture was agitated using a rotary laboratory mixer. Following sorption, the suspension was centrifuged at 8000 rpm for 15 minutes and an aliquot of each resulting supernatant was then collected and analysed using a Modumatic model gamma spectrometer fitted with a NaI (TI) detector. Isotherm studies were conducted using a solution of  $Ba^{2+}$  and

Cs<sup>+</sup> (containing radiotracer <sup>133</sup>Ba and <sup>137</sup>Cs), respectively, with an initial concentration ranging from 1x10<sup>-4</sup> to 1x10<sup>-1</sup> mol/L and 5.0 g/L of MXF-30. For Ba<sup>2+</sup>, the initial pH and contact time were maintained at 8.0 and 135 min, respectively. For Cs<sup>+</sup>, the initial pH was set at 5.5, and the contact time was also 135 min. Selectivity study and effect of coexisting ions has been carried out in the presence of Ba<sup>2+</sup> and Cs<sup>+</sup> ions (containing radiotracer <sup>133</sup>Ba and <sup>137</sup>Cs), at pH 5.5 and 8.0. Similar conditions were used for determining the effect of coexisting ions (Na<sup>+</sup>, K<sup>+</sup>, Ca<sup>2+</sup>, Co<sup>2+</sup>, and Mg<sup>2+</sup>) on the adsorption capacities of MXF-30. In coexisting ions study, a concentration of 5x10<sup>-2</sup> mol/L was used for each of the added ions (Na<sup>+</sup>, K<sup>+</sup>, Ca<sup>2+</sup>, Co<sup>2+</sup>, Mg<sup>2+</sup>, Ba<sup>2+</sup>, Cs<sup>+</sup>) by employing 5.0 g/L of MXF-30, (containing radiotracer <sup>133</sup>Ba and <sup>137</sup>Cs).

In regeneration studies, adsorption experiments were performed by using 5x10<sup>-2</sup> mol/L concentration of Ba<sup>2+</sup> and Cs<sup>+</sup> ions (containing radiotracer <sup>133</sup>Ba and <sup>137</sup>Cs), under optimal conditions at natural pH, while desorption experiments were conducted by employing ultrasonication conditions for 30 minutes at room temperature, using 1.0 M HCl solution as eluent.

The XPS analyses of the samples obtained after Ba<sup>2+</sup> and Cs<sup>+</sup> adsorption was accomplished under non-radioactive conditions.

The Eqs. (2-5), provided below were employed for the calculation of equilibrium concentration ( $C_{eq}$ ), distribution coefficient ( $K_d$ ), and adsorption capacity ( $q$ ) and selectivity coefficient ( $\beta$ ).

Equilibrium concentration ( $C_{eq}$ )

$$C_{eq} = \frac{C_0 \times a}{a_0} \quad (\text{mol/L})$$

(2)

Distribution coefficient ( $K_d$ )

$$K_d = \frac{(a_0 - a)}{a} \times \frac{V}{m} \text{ (mL/g)} \quad (3)$$

Adsorption capacity ( $q$ )

$$q = K_d \times C_{eq} \text{ (mmol/g)} \quad (4)$$

Selectivity coefficient ( $\beta$ )

$$\beta_{1,2} = \frac{K_{d1}}{K_{d2}} \quad (5)$$

In the above Eqs. (2-5),  $C_0$  is the initial concentration of the solute in aqueous phase (mol/L),  $C_{eq}$  is the equilibrium concentration of the solute in aqueous phase (mol/L),  $V$  is the volume of the aqueous phase (mL),  $m$  is the mass of sorbent (g),  $a_0$  is the initial volume activity of solution (B<sub>q</sub>/mL),  $a$  is the equilibrium volume activity of solution (B<sub>q</sub>/mL), and  $K_d$  is the distribution coefficient (mL/g).

#### **S4 Characterization**

The purity of powder samples was estimated by using a PANalytical X-ray diffractometer equipped with CuK<sub>α</sub> radiation and 2θ ranging from 3-70°. Morphological and structural studies was examined using scanning electron microscopy-energy dispersive spectroscopy (SEM/EDS, Tescan Lyra III) EDS, transmission electron microscopy (TEM, using JEOL JEM ARM 200 cF) including high resolution transmission electron microscopy (HRTEM) and selected area electron diffraction (SAED) patterns. The Fourier-transform infrared spectroscopy- attenuated total reflectance (FTIR-ATR) instrument (Bruker, Tensor 27) was used to acquire spectra in the range of 650-4000 cm<sup>-1</sup>. Qualitative and quantitative chemical analysis at the surface of the samples before and after adsorption studies was performed using X-ray photoelectron spectroscopy (XPS, Omicron multiprobe system) equipped with

hemispherical mirror analyzers and monochromatic Al  $K_{\alpha}$  radiation. The surface area measurements were recorded using BET (Brunauer-Emmet-Teller) method in the range of relative pressure  $p/p_0 = 0,05-0,25$  on Sorptomatic 1990 SERIES, ThermoFinnigan, Milan, Italie, with the  $N_2$  adsorption at  $T = 77.1$  K.

**Table S2** ANOVA for  $Ba^{2+}$  adsorption onto MXF-30

| <i>ANOVA</i>    |                |                    |             |         |          |       |
|-----------------|----------------|--------------------|-------------|---------|----------|-------|
| Source          | Sum of squares | Degrees of Freedom | Mean square | F Value | P Value  | $R^2$ |
| Model           | 5.890E+05      | 9                  | 65439.80    | 125.05  | < 0.0001 | 0.99  |
| A-pH            | 1326.75        | 1                  | 1326.75     | 2.54    | 0.1553   |       |
| B-Contact time  | 6203.00        | 1                  | 6203.00     | 11.85   | 0.0108   |       |
| C-Concentration | 5.623E+05      | 1                  | 5.623E+05   | 1074.51 | < 0.0001 |       |
| AB              | 751.86         | 1                  | 751.86      | 1.44    | 0.2697   |       |
| AC              | 18.90          | 1                  | 18.90       | 0.0361  | 0.8547   |       |
| BC              | 978.92         | 1                  | 978.92      | 1.87    | 0.2137   |       |
| A <sup>2</sup>  | 477.19         | 1                  | 477.19      | 0.9119  | 0.3714   |       |
| B <sup>2</sup>  | 940.71         | 1                  | 940.71      | 1.80    | 0.2219   |       |
| C <sup>2</sup>  | 15087.17       | 1                  | 15087.17    | 28.83   | 0.0010   |       |
| Lack of fit     | 2135.57        | 3                  | 711.86      | 1.86    | 0.2764   |       |

**Table S3** ANOVA for Cs<sup>+</sup> adsorption onto MXF-30

| <i>ANOVA</i>    |                |                    |             |         |          |                |
|-----------------|----------------|--------------------|-------------|---------|----------|----------------|
| Source          | Sum of squares | Degrees of Freedom | Mean square | F Value | P Value  | R <sup>2</sup> |
| Model           | 1.163E+06      | 9                  | 1.292E+05   | 48.91   | < 0.0001 | 0.98           |
| A-pH            | 1835.40        | 1                  | 1835.40     | 0.6950  | 0.4320   |                |
| B-Contact time  | 63254.42       | 1                  | 63254.42    | 23.95   | 0.0018   |                |
| C-Concentration | 9.619E+05      | 1                  | 9,619E+05   | 364.24  | < 0.0001 |                |
| AB              | 603.80         | 1                  | 603.80      | 0.2286  | 0.6471   |                |
| AC              | 479.30         | 1                  | 479.30      | 0.1815  | 0.6829   |                |
| BC              | 13364.70       | 1                  | 13364.70    | 5.06    | 0.0592   |                |
| A <sup>2</sup>  | 38703.16       | 1                  | 38703.16    | 14.66   | 0.0065   |                |
| B <sup>2</sup>  | 37322.32       | 1                  | 37322.32    | 14.13   | 0.0071   |                |
| C <sup>2</sup>  | 32356.38       | 1                  | 32356.38    | 12.25   | 0.0100   |                |
| Lack of fit     | 13162.85       | 3                  | 4387.62     | 3.30    | 0.1396   |                |



**Table S4.** Kinetic parameters for adsorption of Ba<sup>2+</sup> and Cs<sup>+</sup> on MXF-30 obtained by applying pseudo first order, pseudo second order and intraparticle diffusion models.

|                        | Pseudo first order |                   |       | Pseudo second order       |                   |       | Intraparticle diffusion             |                 |       |
|------------------------|--------------------|-------------------|-------|---------------------------|-------------------|-------|-------------------------------------|-----------------|-------|
|                        | $k_1$<br>(1/min)   | $q_e$<br>(mmol/g) | $R^2$ | $k_2$<br>(g/mmol<br>min)  | $q_e$<br>(mmol/g) | $R^2$ | $Ki$<br>(mmol/gmin <sup>1/2</sup> ) | $C$<br>(mmol/g) | $R^2$ |
| <b>Ba<sup>2+</sup></b> | 0.018              | 0.857             | 0.961 | 1.1 x<br>10 <sup>-1</sup> | 2.664             | 0.999 | 0.042                               | 1.955           | 0.972 |
| <b>Cs<sup>+</sup></b>  | 0,032              | 4.501             | 0.927 | 1.2 x<br>10 <sup>-2</sup> | 4.403             | 0.995 | 0.144                               | 2.066           | 0.834 |

**Table S5** Literature comparison of MXene materials in removal of metal cations

| Compositions                                                                                          | Ions                                | Synthesis method                                                                                                                                                                          | Removal capacity                                                                             | Ref              |
|-------------------------------------------------------------------------------------------------------|-------------------------------------|-------------------------------------------------------------------------------------------------------------------------------------------------------------------------------------------|----------------------------------------------------------------------------------------------|------------------|
| 1D/2D hybrid MXene/AgNW composite                                                                     | I <sup>-</sup><br>Cs <sup>+</sup>   | Conventional stirring of MXene with AgNW                                                                                                                                                  | 84.70 for I <sup>-</sup> and 26.22 for Cs <sup>+</sup> mg/g in 240 min                       | 1                |
| PBMX-III spheres                                                                                      | Cs <sup>+</sup>                     | Ultrasonication of MXene with Prussian blue sphere, followed by freeze drying to prepare aerogels                                                                                         | 315.91 mg/g for Cs <sup>+</sup>                                                              | 2                |
| Ti <sub>3</sub> C <sub>2</sub> T <sub>x</sub> /POSS-NH <sub>2</sub>                                   | Cs <sup>+</sup>                     | Refluxing of MXene and POSS-NH <sub>2</sub> in THF                                                                                                                                        | 148 mg/g at pH 7                                                                             | 3                |
| Ti <sub>3</sub> C <sub>2</sub> T <sub>x</sub> and Alk - Ti <sub>3</sub> C <sub>2</sub> T <sub>x</sub> | Ba <sup>2+</sup>                    | Ti <sub>3</sub> C <sub>2</sub> T <sub>x</sub> using HF etching method, Alk-Ti <sub>3</sub> C <sub>2</sub> T <sub>x</sub> - Immersing in 5% NaOH followed by washing and drying at RT/48 h | 46.46 mg/g (three times higher than pristine Ti <sub>3</sub> C <sub>2</sub> T <sub>x</sub> ) | 4                |
| Ti <sub>3</sub> C <sub>2</sub> T <sub>x</sub>                                                         | Ba <sup>2+</sup><br>Cs <sup>+</sup> | Using acid + salt etching (HCl+NH <sub>4</sub> F)                                                                                                                                         | 154.9 and 121.5 mg/g for <sup>133</sup> Ba and <sup>137</sup> Cs                             | 5                |
| MXF-30                                                                                                | Ba <sup>2+</sup><br>Cs <sup>+</sup> | Solvothermal method by employing MXene and Fe <sub>3</sub> O <sub>4</sub> nanoparticles                                                                                                   | 573.8 (4.18 mmol/g) and 843.3 mg/g (6.34 mmol/g) for <sup>133</sup> Ba and <sup>137</sup> Cs | <b>This work</b> |

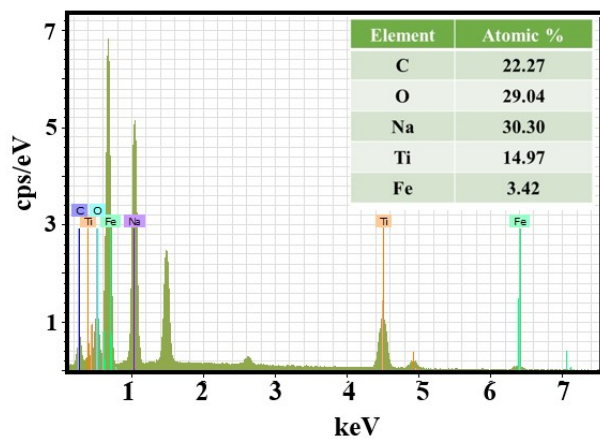

**Fig. S1** SEM-EDS analysis of MXF-30.

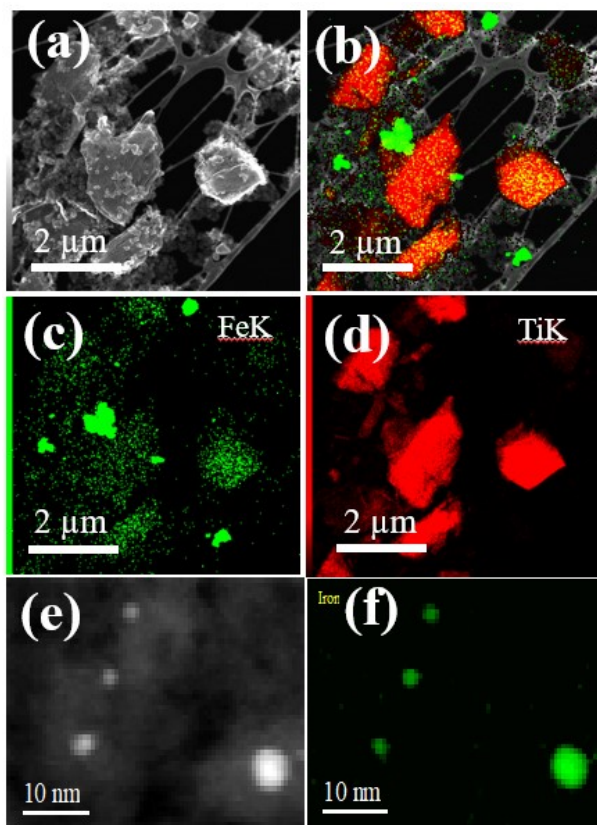

**Fig. S2** (a) SEI STEM image of MXF-30 and its relevant EDS mapping of (c) Fe K and (d) Ti K. (b) overlay of FeK and TiK maps. (e) ADF STEM image of  $\text{Fe}_3\text{O}_4$  nanoparticles (bright) in MXF-30 sample. (f) EELS STEM map of  $\text{FeL}_{3,2}$ -edge.

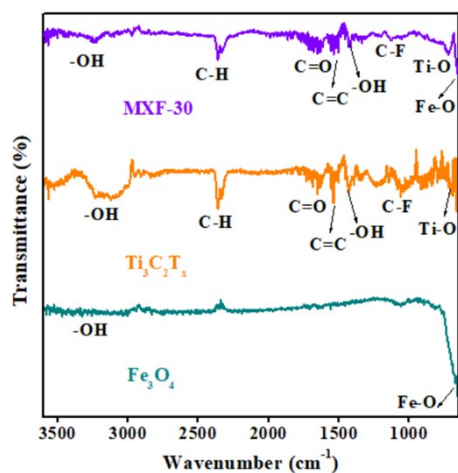

Fig. S3 FTIR spectra of  $\text{Fe}_3\text{O}_4$ ,  $\text{Ti}_3\text{C}_2\text{T}_x$  and MXF-30.

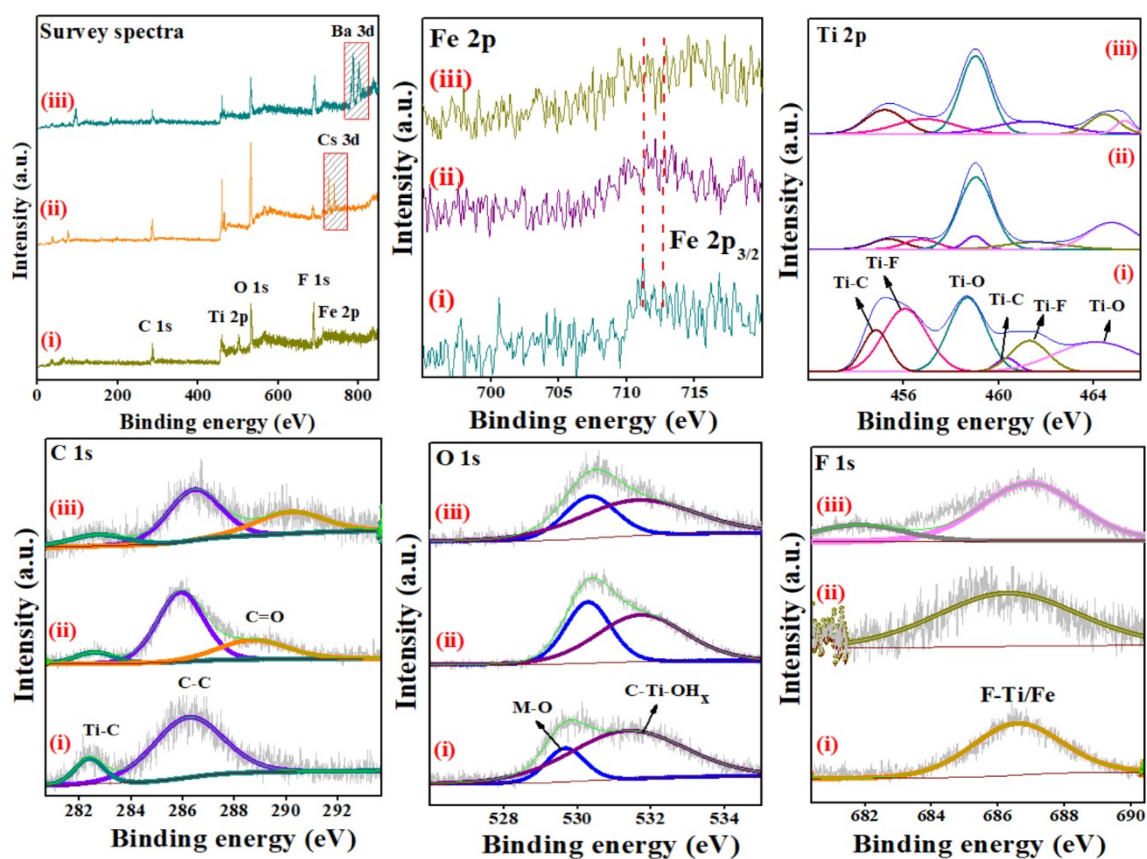

Fig. S4 XPS survey and high-resolution spectra of Fe 2p, Ti 2p, C 1s, O 1s and F 1s for (i) MXF-30, (ii)MXF-30-Ba and (iii) MXF-30-Cs.

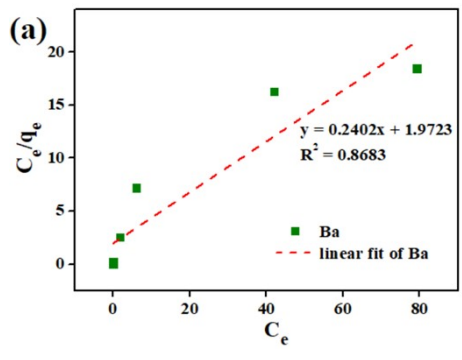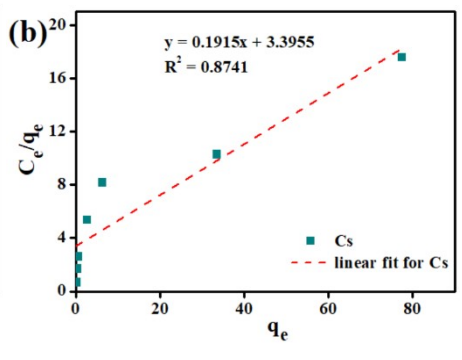

**Fig. S5** Langmuir adsorption isotherm for Ba<sup>2+</sup> and Cs<sup>+</sup> adsorption.

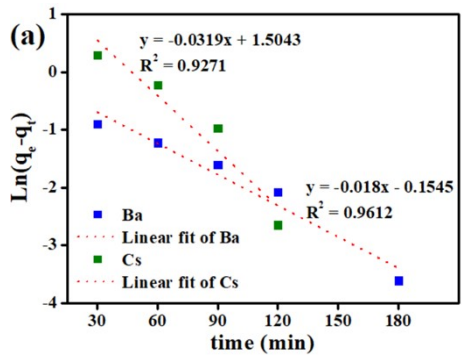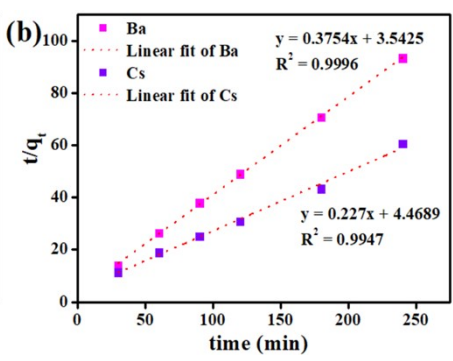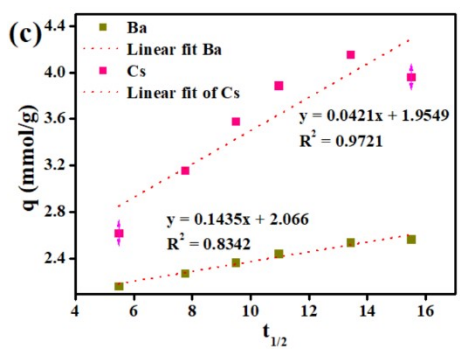

**Fig. S6** Kinetic models for  $\text{Ba}^{2+}$  and  $\text{Cs}^+$  removal (a) pseudo first order model (b) pseudo second order model (c) intraparticle diffusion model.

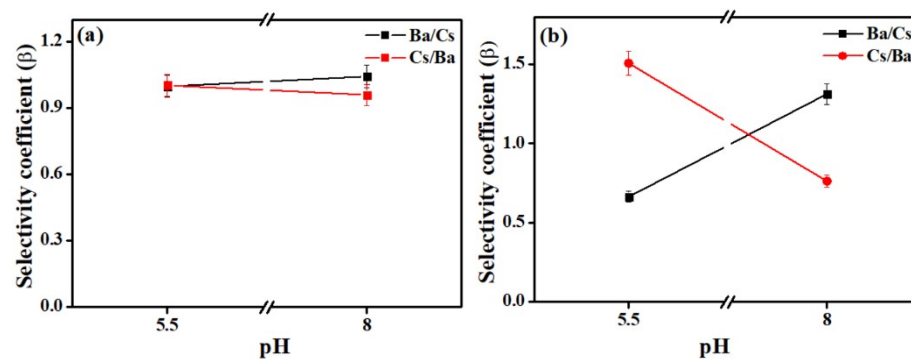

**Fig. S7** Selectivity coefficient ( $\beta$ ) values in (a) binary solutions (b) complex ion solutions.



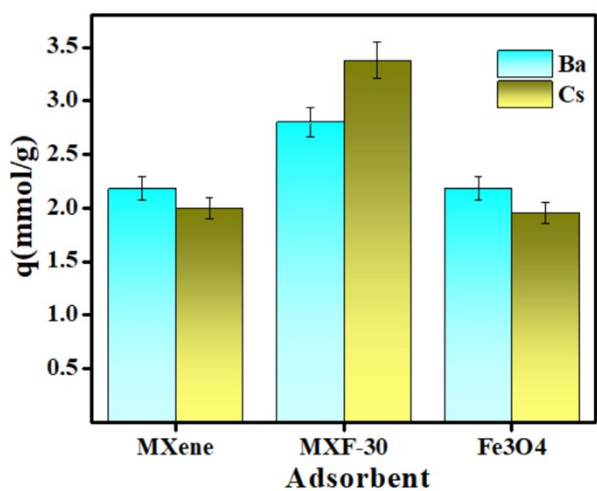

**Fig. S8** Adsorption performance of  $Ti_3C_2T_x$ ,  $Fe_3O_4$  and MXF-30 in removal of  $Ba^{2+}$  and  $Cs^+$  at pH 8.0 and pH 5.5.

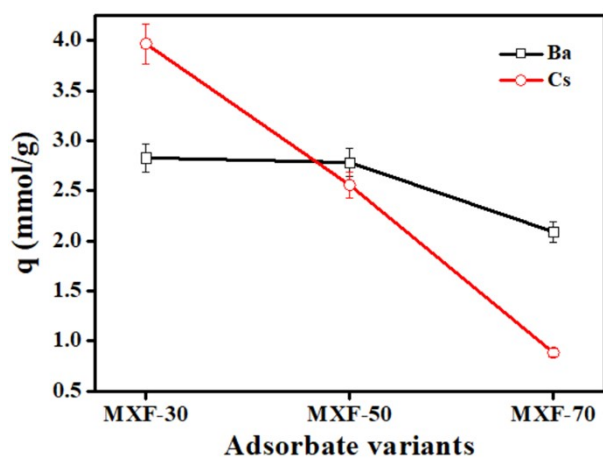

**Fig. S9** Adsorption performance of MXF-30, MXF-50 and MXF-70 in removal of  $Ba^{2+}$  and  $Cs^+$  at natural pH of water.

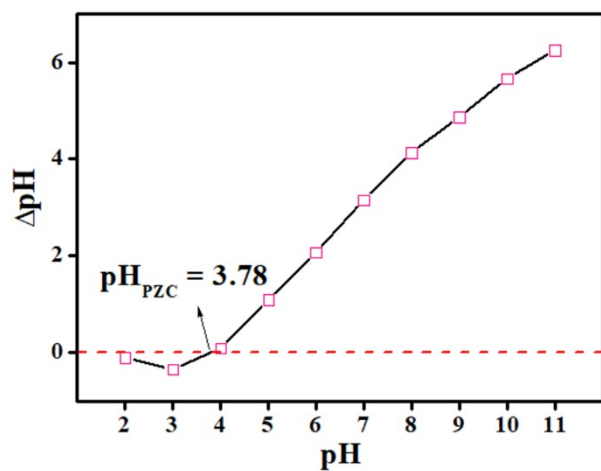

Fig. S10 Assessment of pH of zero-point charge ( $\text{pH}_{\text{PZC}}$ ) of MXF-30 using the drift method.

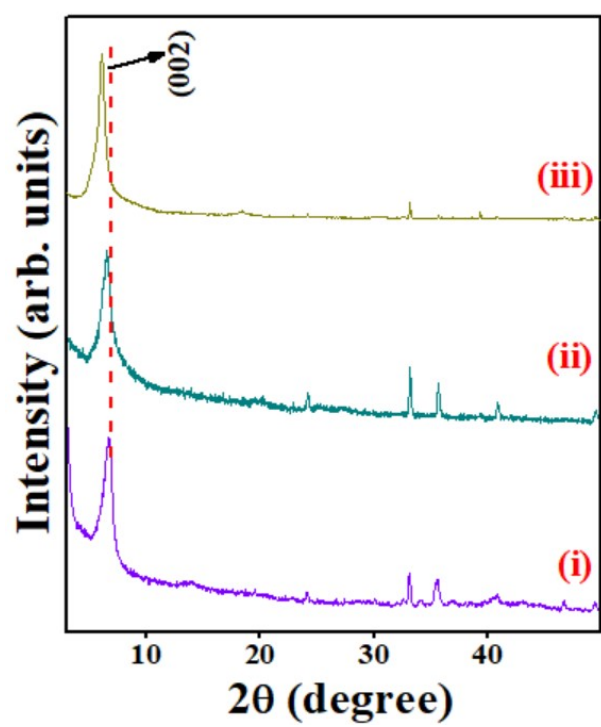

Fig. S11 PXRD patterns for the (i) MXF-30, (ii)MXF-30-Ba and (iii) MXF-30-Cs.

## References

- 1 S. Mushtaq, S. M. Husnain, S. A. R. Kazmi, Y. Abbas, J. Jeon, J. Y. Kim and F. Shahzad, MXene/AgNW composite material for selective and efficient removal of radioactive cesium and iodine from water, *Sci. Rep.*, 2023, **13**, 19696.
- 2 A. Shahzad, M. Moztahida, K. Tahir, B. Kim, H. Jeon, A. A. Ghani, N. Maile, J. Jang and D. S. Lee, Highly effective prussian blue-coated MXene aerogel spheres for selective removal of cesium ions, *J. Nucl. Mater.*, 2020, **539**, 152277.
- 3 M. Rethinasabapathy, S. K. Hwang, S.-M. Kang, C. Roh and Y. S. Huh, Amino-functionalized POSS nanocage-intercalated titanium carbide ( $Ti_3C_2T_x$ ) MXene stacks for efficient cesium and strontium radionuclide sequestration, *J. Hazard. Mater.*, 2021, **418**, 126315.
- 4 W. Mu, S. Du, Q. Yu, X. Li, H. Wei and Y. Yang, Improving barium ion adsorption on two-dimensional titanium carbide by surface modification, *Dalt. Trans.*, 2018, **47**, 8375–8381.
- 5 V. V. Kusumkar, S. Atri, S. İnan, M. Gregor, T. Roch, H. Makarov, M. Caplovicova,

M. Galambos, E. Viglasova and G. Plesch, Application of MXene for remediation of low-level radioactive aqueous solutions contaminated with  $^{133}\text{Ba}$  and  $^{137}\text{Cs}$ , *Chem. Commun.*, 2023, **59**, 12007–12010.
